# Supplementary material for: Simultaneous purification of dihydrotanshinone, tanshinone I, cryptotanshinone, and tanshinone IIA from Salvia miltiorrhiza and their anti-inflammatory activities investigation
Source: PubMed Central journal article supplement (PMC5981213; doi:10.1038/s41598-018-26828-0), 2018-05-31
Supplement: 41598_2018_26828_MOESM1_ESM.pdf [file 41598_2018_26828_MOESM1_ESM.pdf]

**Simultaneous purification of dihydrotanshinone, tanshinone I, cryptotanshinone, and tanshinone IIA from *Salvia miltiorrhiza* and their anti-inflammatory activities investigation**

Hongwei Gao<sup>1</sup>, Liting Huang<sup>1</sup>, Fang Ding<sup>1</sup>, Ke Yang<sup>1</sup>, Yulin Feng<sup>2\*</sup>, Hongzhen Tang<sup>1\*</sup>, Qiong-ming Xu<sup>3</sup>, Jianfang Feng<sup>1</sup>, Shilin Yang<sup>1,2</sup>

<sup>1</sup>Guangxi University of Chinese Medicine, Nanning 530000, China. <sup>2</sup>State Key Laboratory of Innovative Drug and Efficient Energy-Saving Pharmaceutical Equipment, Jiangxi University of Traditional Chinese Medicine, Nanchang 330004, China.

<sup>3</sup>College of Pharmaceutical Science, Soochow University, Suzhou 215123, China.

Correspondence and requests for materials should be addressed to Y. Feng (fengyulin2003@126.com) or H. Tang (383744825@qq.com).

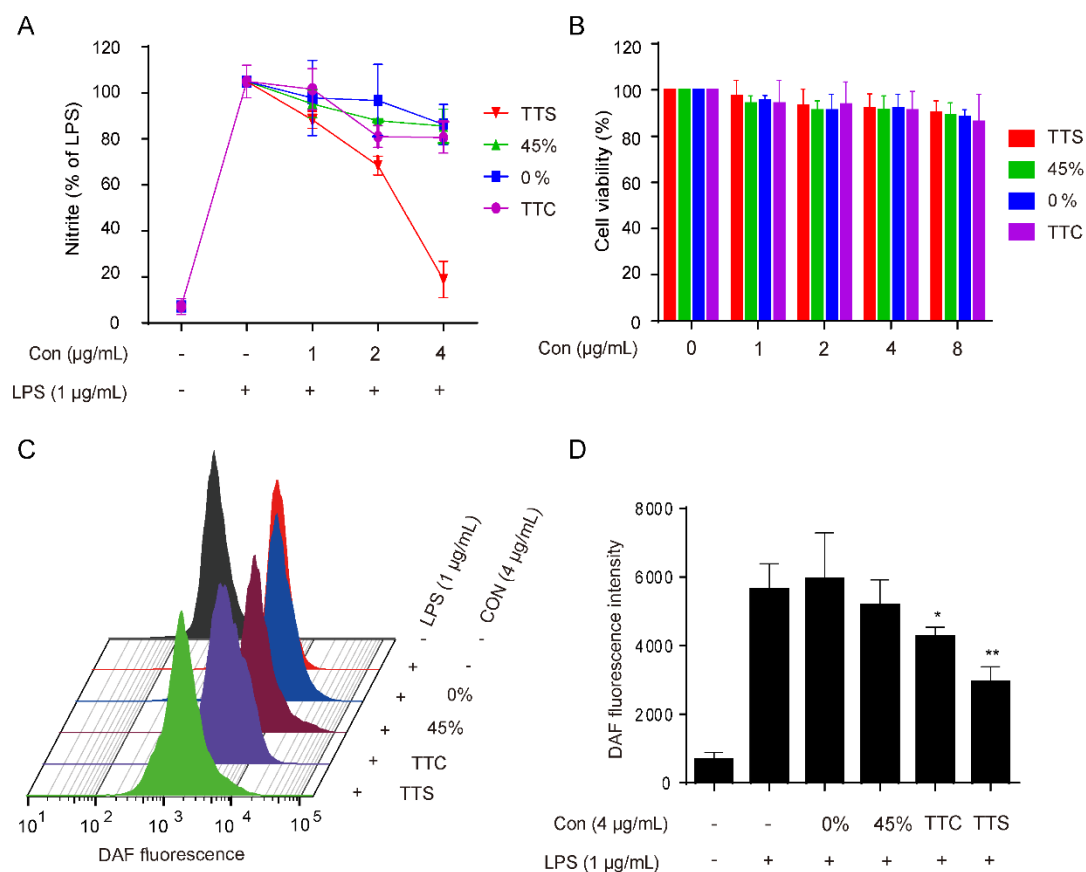

**Figure 1S.** The inhibitory nitric oxide (NO) release of TTS in LPS-stimulated RAW264.7 cells. (A). Cells were pretreated with 0% eluent, 45% eluent, TTC and TTS for 1 h before LPS (1µg/mL) co-culture for 24 h. The nitrite level of those sample were determined by Griess assay. (B) Cells were treated with 0% eluent, 45% eluent, TTC and TTS, respectively for 24 h. The cell viability was investigated by MTT assay. (C). Cells were individually treated with 0% eluent, 45% eluent, TTC and TTS for 6 h and then labeled with DAF-FM (1µM) for another 1 h. The NO release was determined by the flow cytometry. (D) The quantitative fluorescence intensity was statistically determined. \* $p < 0.05$  and \*\* $p < 0.01$  versus LPS-treated group.

**Table S1.** Dynamic desorption capacities of two resins.

| Resin  | Desorption (mg)   |              |                |                |
|--------|-------------------|--------------|----------------|----------------|
|        | Dihydratanshinone | Tanshinone I | Cryptanshinone | Tanshinone IIA |
| D101   | 9.24±0.71         | 20.16±0.39   | 25.46±0.56     | 32.94±0.84     |
| HPD100 | 8.83±0.54         | 19.87±0.73   | 25.41±0.38     | 31.43±1.34     |
